# Supplementary material for: Establishing the A. E. Watkins landrace cultivar collection as a resource for systematic gene discovery in bread wheat
Source: PubMed Central journal article supplement (PMC4110413; doi:10.1007/s00122-014-2344-5), 2014-07-02
Supplement: 122_2014_2344_MOESM1_ESM.pdf [file 122_2014_2344_MOESM1_ESM.pdf]

## Establishing the A. E. Watkins landrace cultivar collection as a resource for systematic gene discovery in bread wheat.

Luzie U. Wingen · Simon Orford · Richard Goram · Michelle Leverington-Waite, · Lorelei Bilham · Theofania S. Patsiou · Mike Ambrose · Jo Dicks · Simon Griffiths

Received: date / Accepted: date

### References

- [Anderson et al., 1993] Anderson, J. A., Churchill, G. A., Autrique, J. E., Tanksley, S. D., and Sorrells, M. E. (1993). Optimizing parental selection for genetic linkage maps. *Genome*, 36:181–186.
- [Balfourier et al., 2007] Balfourier, F., Roussel, V., Strelchenko, P., Exbrayat-Vinson, F., Sourdille, P., Boutet, G., Koenig, J., Ravel, C., Mitrofanova, O., Beckert, M., and Charmet, G. (2007). A worldwide bread wheat core collection arrayed in a 384-well plate. *Theoretical and Applied Genetics*, 114:1265–1275.
- [Huang et al., 2002] Huang, X. Q., Börner, A., Röder, M. S., and Ganal, M. W. (2002). Assessing genetic diversity of wheat (*Triticum aestivum* L.) germplasm using microsatellite markers. *Theoretical and Applied Genetics*, 105(5):699–707.
- [Petit et al., 1998] Petit, R., El Mousadik, A., and Pons, O. (1998). Identifying populations for conservation on the basis of genetic markers. *Conserv Biol*, 12:844–855.
- [Raman et al., 2010] Raman, H., Stodart, B., Cavanagh, C., Mackay, M., Morell, M., Milgate, A., and Martin, P. (2010). Molecular diversity and genetic structure of modern and traditional landrace cultivars of wheat (*Triticum aestivum* L.). *Crop. Pasture Sci.*, 61:222–229.
- [Reeves et al., 2004] Reeves, J., Chiapparino, E., Donini, P., Ganal, M., Guiard, J., Hamrit, S., Heckenberger, M., Huan, X., Van, Kaauwen, M., Kochieva, E., Koebner, R., Law, J., Lea, V., LeClerc, V., Van der Lee, T., Leigh, F., Van der Linden, G., Malysheva, L., Melchinger, A., Orford, S., Reif, J., Röder, M., Schulman, A., Vosman, B., Van der Wiel, C., Wolf, M., and Zhang, D. (2004). Changes over time in the genetic diversity of four major European crops: a report from the GEDIFLUX Framework 5 Project. In Vollmann, J., Grausgruber, H., and Ruckenbauer, P., editors, *Genetic variation for plant breeding. Proceedings of the 17th EUCARPIA General Congress, Tulln, Austria, 8-11 September 2004*, pages 3–7.
- [Reif et al., 2005] Reif, J. C., Melchinger, A. E., and Frisch, M. (2005). Genetical and mathematical properties of similarity and dissimilarity coefficients applied in plant breeding and seed bank management. *Crop Science*, 45:1–7.
- [Röder et al., 2002] Röder, M., Wendehake, K., Korzun, V., Bredemeijer, G., Laborie, D., Bertrand, L., Isaac, P., Rendell, S., Jackson, J., Cooke, R., Vosman, B., and Ganal, M. (2002). Construction and analysis of a microsatellite-based database of European wheat varieties. *Theor Appl Genet.*, 106(1):67–73.
- [Roussel et al., 2005] Roussel, V., Leisova, L., Exbrayat, F., and Balfourier, F. (2005). SSR allelic diversity changes in 480 European bread wheat varieties released from 1840 to 2000. *Theoretical and Applied Genetics*, 111:162–170.

---

L.U. Wingen, S. Orford, R. Goram, M. Leverington-Waite, L. Bilham, M. Ambrose, T. S. Patsiou, J. Dicks, S. Griffiths  
John Innes Centre  
Norwich Research Park  
Norwich, UK  
Tel.: +1603-450-508  
Fax: +1603-450-045  
E-mail: luzie.wingen@jic.ac.uk

- 
- [Thachuk et al., 2009] Thachuk, C., Crossa, J., Franco, J., Dreisigacker, S., Warburton, M., and Davenport, G. F. (2009). Core hunter: an algorithm for sampling genetic resources based on multiple genetic measures. *BMC Bioinformatics*, 10(243).
- [Wei et al., 2005] Wei, Y.-M., Hou, Y.-C., Yan, Z.-H., Wu, W., Zhang, Z.-Q., Liu, D.-C., and Zheng, Y.-L. (2005). Microsatellite DNA polymorphism divergence in Chinese wheat (*Triticum aestivum* L.) landraces highly resistant to fusarium head blight. *Journal of Applied Genetics*, 46:3–9.
- [White et al., 2008] White, J., Law, J., MacKay, I., Chalmers, K., Smith, J., Kilian, A., and Powell, W. (2008). The genetic diversity of UK, US and Australian cultivars of *Triticum aestivum* measured by DArT markers and considered by genome. *Theoretical and Applied Genetics*, 116:439–453.

---

**List of Figures**

- 1 **Supplementary Material: A:** InPD statistic of the main STRUCTURE run, **B-D:**  $\delta K$  statistics to determine the number of ancestral populations in the Watkins collection: complete collection (B), 424 subgroup (C), and 630 subgroup (D). . . . . 4
- 2 **Supplementary Material: A:** InPD statistic of the main STRUCTURE run on Gediflux collection, **B:**  $\delta K$  statistics to determine the number of ancestral populations whole collection (B) . . . . . 5

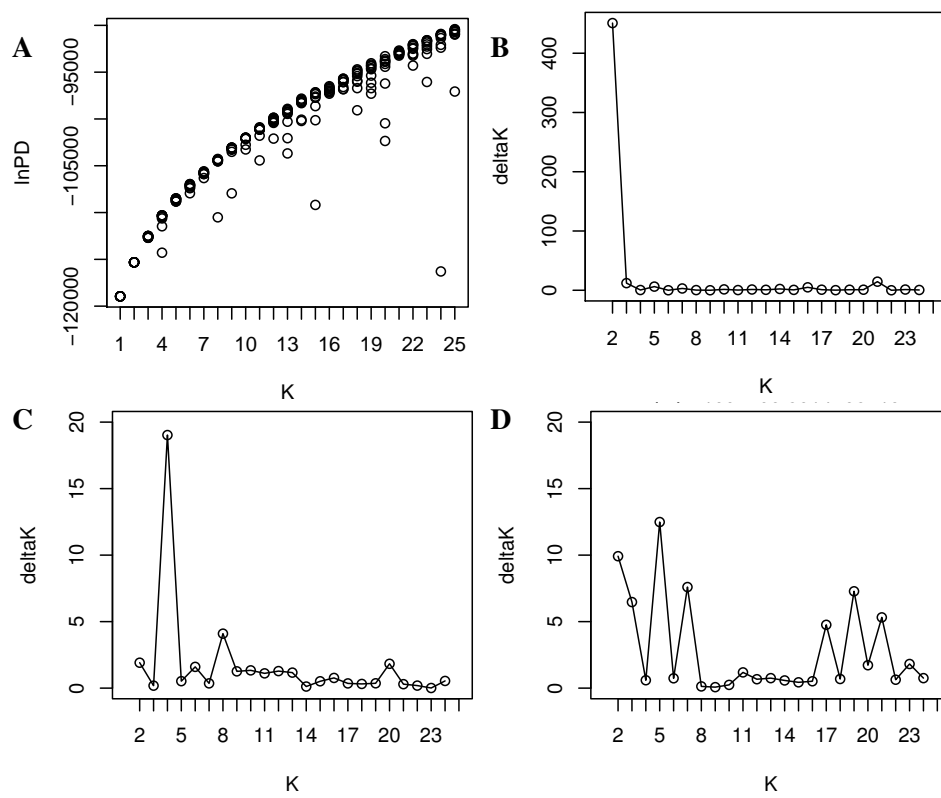

**Fig. 1 Supplementary Material: A:** InPD statistic of the main STRUCTURE run, **B-D:**  $\delta K$  statistics to determine the number of ancestral populations in the Watkins collection: complete collection (B), 424 subgroup (C), and 630 subgroup (D).

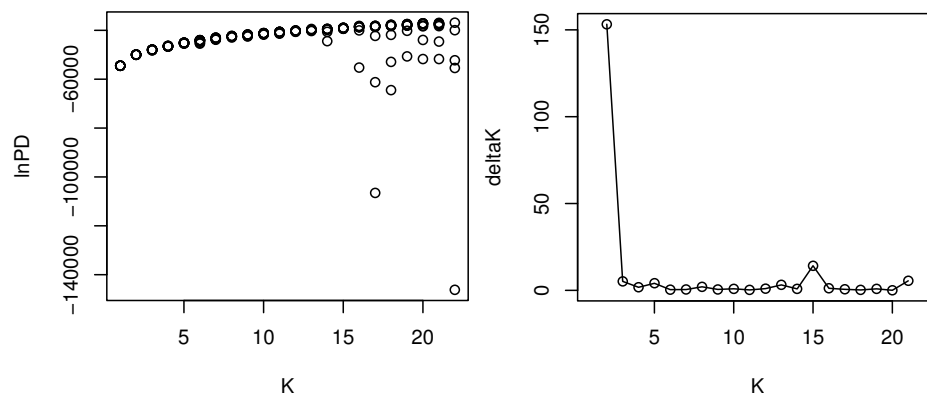

**Fig. 2 Supplementary Material: A:** InPD statistic of the main STRUCTURE run on Gediflux collection, **B:**  $\delta K$  statistics to determine the number of ancestral populations whole collection (B)

## List of Tables

|   |                                                                                                                                                                                                                                                                                                                                                                                                                                                                                                                                                                                                                                                                                                                             |    |
|---|-----------------------------------------------------------------------------------------------------------------------------------------------------------------------------------------------------------------------------------------------------------------------------------------------------------------------------------------------------------------------------------------------------------------------------------------------------------------------------------------------------------------------------------------------------------------------------------------------------------------------------------------------------------------------------------------------------------------------------|----|
| 1 | <b>Supplementary Material:</b> Common genetic diversity indices. $n$ is the total number of allele occurrences. $n_i$ is the number of occurrences of the $i^{th}$ allele. $g$ is the number of loci. $n > g$ . $n_{st}$ is the total number of allele occurrences in a standardised set, all sets of similar size. $g_{st}$ is the number of loci in a standardised set. $n_{st} > g_{st}$ . $p_i$ is the frequency of the $i^{th}$ allele. $p_{ij}$ and $q_{ij}$ are allele frequencies of the $j^{th}$ allele at the $i^{th}$ locus. For original citations see [Petit et al., 1998] for eq. 3; [Anderson et al., 1993] for eq 4; [Reif et al., 2005] for eqs. 5,6, and 7; and [Thachuk et al., 2009] for eq. 8. . . . . | 8  |
| 2 | <b>Supplementary Material:</b> Summary statistics of the phenotype values observed for 726 LCs of the Watkins collection in field trials in 2006. Names of LCs that were selected as a parent for the development of bi-parental populations are listed in the last two columns. The selection criterion for the LC parent was the display of a phenotype within the extreme borders of the phenotype range. Broad-sense heritability for plant height was 0.92 and for days to heading date 0.98. Abbreviation: $d_{SWIP}$ =Shannon-Weaver Diversity Index, calculated on phenotypic classes. . . . .                                                                                                                      | 9  |
| 3 | <b>Supplementary Material:</b> Summary statistics of the phenotypic values observed for the Gediflux collection (top) and for the Watkins core set (119 LCs) in 2011 (bottom). Abbreviations: min=minimal phenotypic value, max=maximal phenotypic value, $H^2$ =broad-sense heritability, $d_{SWIP}$ =Shannon-Weaver diversity index, calculated on phenotypic classes, $V_e$ =genotypic variance, $V_e$ =environmental variance, W2006= Watkins collection grown in 2006 (for comparison) . . . . .                                                                                                                                                                                                                       | 10 |
| 4 | <b>Supplementary Material:</b> Summary of the genotyping outcome [Reeves et al., 2004] and diversity statistics for 42 SSR markers on the Gediflux collection. Abbreviations: chr: putative chromosome locations according to Gramene database ( <a href="http://www.gramene.org/markers">http://www.gramene.org/markers</a> ), $d_{AR}$ : Allele Richness, $d_{RAR}$ : Number Of Rare Alleles, $\hat{r}(g)$ : Allele Richness After Rare-faction, $d_{Nei}$ : Nei's Gene Diversity, $d_{PIC}$ : Polymorphic Information Content, $d_{SWI}$ : Shannon-Weaver Diversity Index See Tab. 1 for the diversity index keys in the column headers. . . . .                                                                         | 11 |
| 5 | <b>Supplementary Material:</b> List of accessions and country of origin of LCs included in the core set (119 LCs). . . . .                                                                                                                                                                                                                                                                                                                                                                                                                                                                                                                                                                                                  | 12 |
| 6 | <b>Supplementary Material:</b> Diversity statistics of the core set (119 LCs). The core set preserves 98% or 96% of the total genetic diversity (diversity index $d_{Nei}$ or $d_{SWI}$ , respectively) . . . . .                                                                                                                                                                                                                                                                                                                                                                                                                                                                                                           | 13 |
| 7 | <b>Supplementary Material:</b> Average levels of genetic diversity of wheat collections as published in the literature compared to the present study. Abbreviations: LC landrace cultivar; MC modern elite cultivar; UK United Kingdom; USA United States of America; AUS Australia; EUR Europe; CHI China; IPK Leibniz Institute of Plant Genetics and Crop Plant Research, Germany; INRA French National Institute for Agricultural Research; n.a. not applicable . . . . .                                                                                                                                                                                                                                               | 14 |
| 8 | <b>Supplementary Material:</b> Genetic markers employed on the Watkins collection that were also used by [Huang et al., 2002] (H) and/or [Balfourier et al., 2007] (B) and the detected levels of genetic diversity for these markers. . . . .                                                                                                                                                                                                                                                                                                                                                                                                                                                                              | 15 |

- 
- 9 **Supplementary Material:** Comparison of the diversity statistics for 14 markers used to genotype the Watkins collection as well as the Gediflux collection. Abbreviations: chr: chromosome locations according to Gramene database (<http://www.gramene.org/markers>). See Tab. 1 for the diversity index keys in the column headers. Columns labelled G for Gediflux collection or W for Watkins collection. . . . . 16

**Table 1 Supplementary Material:** Common genetic diversity indices.  $n$  is the total number of allele occurrences.  $n_i$  is the number of occurrences of the  $i^{th}$  allele.  $g$  is the number of loci.  $n > g$ .  $n_{st}$  is the total number of allele occurrences in a standardised set, all sets of similar size.  $g_{st}$  is the number of loci in a standardised set.  $n_{st} > g_{st}$ .  $p_i$  is the frequency of the  $i^{th}$  allele.  $p_{ij}$  and  $q_{ij}$  are allele frequencies of the  $j^{th}$  allele at the  $i^{th}$  locus. For original citations see [Petit et al., 1998] for eq. 3; [Anderson et al., 1993] for eq 4; [Reif et al., 2005] for eqs. 5,6, and 7; and [Thachuk et al., 2009] for eq. 8.

| genetic diversity index                             | equation                                                                                    |
|-----------------------------------------------------|---------------------------------------------------------------------------------------------|
| Allele Richness ( $d_{AR}$ )                        | $n$                                                                                         |
| Average Allele Number                               | $\frac{n}{g}$ (1)                                                                           |
| Standardised Number Of Alleles                      | $\frac{n_{st}}{g_{st}}$ (2)                                                                 |
| Number Of Rare Alleles ( $d_{RAR}$ )                | number of alleles with frequency $< 2\%$                                                    |
| Allele Richness After Rare-faction ( $\hat{r}(g)$ ) | $\hat{r} = \sum_{i=1}^g \binom{n-n_i}{g} \binom{n}{g}$ (3)                                  |
| Polymorphic Information Content ( $d_{PIC}$ )       | $d_{PIC} = 1 - \sum_i (p_i)^2 - \sum_i \sum_{j=i+1}^g 2p_i^2 p_j^2$ (4)                     |
| Nei's Gene Diversity ( $d_{Nei}$ )                  | $d_{Nei} = 1 - \sum_i (p_i)^2$ (5)                                                          |
| Modified Rogers Distance ( $d_{MR}$ )               | $d_{MR} = \frac{1}{\sqrt{2g}} \sqrt{\sum_{i=1}^g \sum_{j=1}^{n_j} (p_{ij} - q_{ij})^2}$ (6) |
| Cavalli-Sforza and Edwards Distance ( $d_{CE}$ )    | $d_{CE} = \sqrt{\frac{1}{g} \sum_{i=1}^g (1 - \sum_{j=1}^{n_j} \sqrt{p_{ij} q_{ij}})}$ (7)  |
| Shannon-Weaver Diversity Index ( $d_{SWI}$ )        | $d_{SWI} = - \sum_i (p_i \ln p_i)$ (8)                                                      |



**Table 2 Supplementary Material:** Summary statistics of the phenotype values observed for 726 LCs of the Watkins collection in field trials in 2006. Names of LCs that were selected as a parent for the development of bi-parental populations are listed in the last two columns. The selection criterion for the LC parent was the display of a phenotype within the extreme borders of the phenotype range. Broad-sense heritability for plant height was 0.92 and for heading date 0.98. Abbreviation:  $d_{SWI_P}$ =Shannon-Weaver Diversity Index, calculated on phenotypic classes.

| trait                 | units           | mean | sd   | min  | max   | $d_{SWI_P}$ | LCs near max                  | LCs near min                  |
|-----------------------|-----------------|------|------|------|-------|-------------|-------------------------------|-------------------------------|
| plant height          | cm              | 99.6 | 13.0 | 49.5 | 139.8 | 1.71        | 1190141<br>1190352            | 1190292<br>1190729            |
| heading date          | days            | 18.1 | 9.0  | 0.0  | 51.2  | 1.96        | 1190034<br>1190209<br>1190468 |                               |
| thousand grain weight | g               | 34.9 | 6.2  | 17.1 | 53.5  | 1.64        | 1190238                       | 1190308<br>1190732<br>1190777 |
| grain surface area    | cm <sup>2</sup> | 18.9 | 1.8  | 13.4 | 26.7  | 2.03        | 1190103<br>1190627<br>1190680 | 1190827                       |
| grain width           | cm              | 3.4  | 0.2  | 2.8  | 3.9   | 1.37        | 1190548                       | 1190299<br>1190300<br>1190475 |
| grain length          | cm              | 6.6  | 0.5  | 5.1  | 8.8   | 1.39        | 1190627<br>1190629            | 1190811                       |

**Table 3 Supplementary Material:** Summary statistics of the phenotypic values observed for the Gediflux collection (top) and for the Watkins core set (119 LCs) in 2011 (bottom). Abbreviations: min=minimal phenotypic value, max=maximal phenotypic value,  $H^2$ =broad-sense heritability,  $d_{SWIP}$ =Shannon-Weaver diversity index, calculated on phenotypic classes,  $V_g$ =genotypic variance,  $V_e$ =environmental variance, W2006= Watkins collection grown in 2006 (for comparison)

|              | trait                     | units           | mean | sd   | min  | max   | $H^2$ | $d_{SWIP}$ | $V_g \pm SD$      | $V_e \pm SD$      |
|--------------|---------------------------|-----------------|------|------|------|-------|-------|------------|-------------------|-------------------|
| Gediflux     | plant height              | cm              | 66.3 | 11.6 | 45.0 | 112.8 | 0.97  | 1.47       | <u>125 ± 11</u>   | <u>12.7 ± 3.6</u> |
|              | heading date              | days            | 22.8 | 3.9  | 9.7  | 33.3  | 0.96  | 1.20       | <u>134 ± 1.2</u>  | <u>1.8 ± 1.4</u>  |
|              | grain yield               | t/ha            | 10.5 | 1.6  | 3.9  | 14.5  | 0.82  | -          | <u>200 ± 14</u>   | <u>133 ± 12</u>   |
|              | thousand grain weight     | g               | 51.9 | 4.5  | 38.6 | 69.4  | 0.88  | 1.35       | <u>17.1 ± 4.1</u> | <u>7.1 ± 2.7</u>  |
|              | grain surface area        | cm <sup>2</sup> | 23.1 | 1.4  | 19.1 | 27.7  | 0.92  | 1.74       | <u>1.7 ± 1.3</u>  | <u>0.4 ± 0.7</u>  |
|              | grain width               | cm              | 4.2  | 0.1  | 3.7  | 4.5   | 0.87  | 1.08       | <u>0.0 ± 0.1</u>  | <u>0.0 ± 0.1</u>  |
|              | grain length              | cm              | 6.9  | 0.3  | 6.2  | 7.9   | 0.95  | 0.97       | <u>0.1 ± 0.3</u>  | <u>0.0 ± 0.1</u>  |
|              | ear length                | cm              | 8.0  | 0.8  | 5.8  | 10.9  | 0.90  | -          | <u>2.3 ± 1.5</u>  | <u>0.7 ± 0.9</u>  |
|              | spikelets per ear         |                 | 21.0 | 1.9  | 14.5 | 31.9  | 0.82  | -          | <u>1.6 ± 1.3</u>  | <u>1.1 ± 1.0</u>  |
|              | fertile spikelets per ear |                 | 17.7 | 1.6  | 12.4 | 25.3  | 0.97  | -          | <u>24.8 ± 5.0</u> | <u>2.1 ± 1.4</u>  |
|              | peduncle length           | cm              | 20.4 | 5.2  | 11.6 | 39.1  | 0.92  | -          | <u>2.9 ± 1.7</u>  | <u>0.8 ± 0.9</u>  |
|              | internode 1 length        | cm              | 11.0 | 2.0  | 7.1  | 18.6  | 0.90  | -          | <u>1.2 ± 1.1</u>  | <u>0.4 ± 0.6</u>  |
|              | internode 2 length        | cm              | 7.0  | 1.3  | 4.0  | 13.1  | 0.90  | -          | <u>0.7 ± 0.8</u>  | <u>0.2 ± 0.5</u>  |
|              | internode 3 length        | cm              | 5.3  | 1.0  | 2.9  | 9.7   | 0.91  | -          | <u>0.6 ± 0.8</u>  | <u>0.2 ± 0.5</u>  |
|              | internode 4 length        | cm              | 4.0  | 0.9  | 2.2  | 8.5   | 0.83  | -          | <u>0.3 ± 0.5</u>  | <u>0.2 ± 0.4</u>  |
|              | internode 5 length        | cm              | 1.7  | 0.6  | 0.5  | 4.3   | 0.44  | -          | <u>0.0 ± 0.1</u>  | <u>0.1 ± 0.2</u>  |
|              | internode 6 length        | cm              | 0.7  | 0.3  | 0.3  | 2.5   | 0.75  | -          | <u>0.1 ± 0.2</u>  | <u>0.1 ± 0.2</u>  |
|              | internode mean length     | cm              | 6.0  | 0.9  | 4.0  | 9.7   | 0.90  | -          | <u>0.4 ± 0.6</u>  | <u>0.1 ± 0.4</u>  |
|              | internode number          | cm              | 4.7  | 0.3  | 3.0  | 5.6   | 0.91  | -          | <u>0.7 ± 0.8</u>  | <u>0.2 ± 0.4</u>  |
|              | sd internode mean length  | cm              | 3.5  | 0.7  | 2.0  | 6.2   | 0.49  | -          | <u>0.0 ± 0.1</u>  | <u>0.0 ± 0.2</u>  |
| Watkins Core | heading date              | days            | 16.0 | 5.7  | 5.0  | 31.0  | -     | 1.58       | ~                 | ~                 |
|              | grain yield               | t/ha            | 2.7  | 0.8  | 0.3  | 5.6   | -     | -          | ~                 | ~                 |
|              | thousand grain weight     | g               | 46.6 | 8.7  | 23.8 | 73.4  | -     | 1.92       | ~                 | ~                 |
|              | grain surface area        | cm <sup>2</sup> | 19.9 | 2.3  | 14.1 | 27.8  | -     | 2.15       | ~                 | ~                 |
|              | grain width               | cm              | 3.7  | 0.2  | 3.1  | 4.3   | -     | 1.49       | ~                 | ~                 |
|              | grain length              | cm              | 6.8  | 0.5  | 5.4  | 8.8   | -     | 1.48       | ~                 | ~                 |
| W2006        | heading date              | days            | 18.1 | 9.0  | 0.0  | 51.2  | 0.98  | 1.96       | <u>76.3 ± 8.7</u> | <u>7.4 ± 2.7</u>  |
|              | plant height              | cm              | 99.6 | 13.0 | 49.5 | 139.8 | 0.92  | 1.71       | <u>151 ± 12</u>   | <u>52.7 ± 7.3</u> |

**Table 4 Supplementary Material:** Summary of the genotyping outcome [Reeves et al., 2004] and diversity statistics for 42 SSR markers on the Gediflux collection. Abbreviations: chr: putative chromosome locations according to Gramene database (<http://www.gramene.org/markers>),  $d_{AR}$ : Allele Richness,  $d_{RAR}$ : Number Of Rare Alleles,  $\hat{r}(g)$ : Allele Richness After Rare-faction,  $d_{Nei}$ : Nei's Gene Diversity,  $d_{PIC}$ : Polymorphic Information Content,  $d_{SWI}$ : Shannon-Weaver Diversity Index See Tab. 1 for the diversity index keys in the column headers.

| marker name | chr | missing | $d_{AR}$ | $d_{RAR}$ | $\hat{r}(g)$ | $d_{Nei}$ | $d_{PIC}$ | $d_{SWI}$ |
|-------------|-----|---------|----------|-----------|--------------|-----------|-----------|-----------|
| gwm003      | 3D  | 4.7     | 4        | 2         | 2.3          | 0.50      | 0.38      | 0.72      |
| gwm018      | 1B  | 0.2     | 10       | 3         | 5.3          | 0.62      | 0.54      | 1.21      |
| gwm046      | 7B  | 0.2     | 12       | 3         | 7.8          | 0.69      | 0.67      | 1.61      |
| gwm095      | 2A  | 1.2     | 6        | 1         | 4.8          | 0.63      | 0.58      | 1.22      |
| gwm155      | 3A  | 1.6     | 9        | 3         | 5.0          | 0.57      | 0.51      | 1.13      |
| gwm190      | 5D  | 0.4     | 7        | 2         | 5.0          | 0.74      | 0.70      | 1.46      |
| gwm213      | 5B  | 0.4     | 14       | 8         | 6.4          | 0.70      | 0.66      | 1.50      |
| gwm219      | 6B  | 2.0     | 16       | 8         | 8.3          | 0.78      | 0.76      | 1.85      |
| gwm261      | 2D  | 0.0     | 7        | 3         | 4.0          | 0.46      | 0.42      | 0.89      |
| gwm272      | 5D  | 33.3    | 5        | 0         | 4.4          | 0.66      | 0.60      | 1.22      |
| gwm291      | 5A  | 3.3     | 11       | 4         | 6.3          | 0.65      | 0.62      | 1.42      |
| gwm312      | 2A  | 0.4     | 19       | 9         | 9.2          | 0.79      | 0.77      | 1.95      |
| gwm320      | 2D  | 1.8     | 9        | 2         | 6.7          | 0.73      | 0.70      | 1.58      |
| gwm325      | 6D  | 55.8    | 6        | 3         | 3.7          | 0.57      | 0.48      | 0.99      |
| gwm334      | 6A  | 0.6     | 8        | 1         | 5.8          | 0.66      | 0.60      | 1.34      |
| gwm357      | 1A  | 0.6     | 4        | 1         | 3.1          | 0.53      | 0.47      | 0.92      |
| gwm389      | 3B  | 0.8     | 12       | 4         | 7.6          | 0.80      | 0.77      | 1.82      |
| gwm408      | 5B  | 1.2     | 11       | 6         | 5.0          | 0.64      | 0.57      | 1.24      |
| gwm415      | 5A  | 57.5    | 2        | 0         | 1.5          | 0.03      | 0.03      | 0.07      |
| gwm437      | 7D  | 0.2     | 17       | 11        | 6.4          | 0.53      | 0.50      | 1.23      |
| gwm456      | 3D  | 4.3     | 9        | 3         | 5.8          | 0.70      | 0.65      | 1.44      |
| gwm458      | 1D  | 33.1    | 3        | 0         | 2.7          | 0.48      | 0.39      | 0.75      |
| gwm513      | 4B  | 0.0     | 5        | 1         | 3.7          | 0.32      | 0.30      | 0.67      |
| gwm570      | 6A  | 7.8     | 9        | 2         | 6.0          | 0.68      | 0.63      | 1.40      |
| gwm577      | 7B  | 1.4     | 23       | 11        | 11.9         | 0.88      | 0.87      | 2.39      |
| gwm610      | 4A  | 0.0     | 7        | 4         | 3.4          | 0.19      | 0.18      | 0.46      |
| gwm619      | 2B  | 0.0     | 11       | 5         | 6.4          | 0.73      | 0.69      | 1.56      |
| gwm631      | 7A  | 0.6     | 7        | 3         | 3.7          | 0.54      | 0.44      | 0.92      |
| gwm680      | 6B  | 0.0     | 7        | 5         | 2.6          | 0.52      | 0.40      | 0.79      |
| gwm793      | 1B  | 8.4     | 8        | 1         | 6.5          | 0.77      | 0.73      | 1.64      |
| gwm818      | 1B  | 1.2     | 10       | 5         | 5.7          | 0.70      | 0.66      | 1.45      |
| gwm819      | 4D  | 16.6    | 3        | 0         | 2.7          | 0.19      | 0.18      | 0.39      |
| gwm834      | 7A  | 0.2     | 16       | 6         | 8.9          | 0.70      | 0.68      | 1.73      |
| gwm1397     |     | 9.4     | 17       | 7         | 9.8          | 0.83      | 0.82      | 2.09      |
| gwm1531     |     | 0.4     | 11       | 3         | 5.7          | 0.47      | 0.44      | 1.05      |
| gwm1691     |     | 0.6     | 8        | 3         | 4.9          | 0.56      | 0.52      | 1.14      |
| gwm1749     |     | 0.4     | 26       | 13        | 12.1         | 0.83      | 0.82      | 2.28      |
| gwm1750     |     | 0.8     | 12       | 2         | 7.1          | 0.67      | 0.61      | 1.46      |
| gwm3072     | 4B  | 17.6    | 8        | 2         | 5.4          | 0.68      | 0.63      | 1.36      |
| gwm3092     |     | 2.0     | 14       | 5         | 8.3          | 0.70      | 0.68      | 1.69      |
| gwm3094     |     | 0.2     | 16       | 9         | 7.5          | 0.79      | 0.76      | 1.79      |
| gwm3144     | 3B  | 8.8     | 15       | 7         | 7.4          | 0.67      | 0.64      | 1.53      |
| mean        |     | 6.7     | 10.3     | 4.1       | 5.9          | 0.62      | 0.57      | 1.30      |
| min         |     | 0.0     | 2        | 0         | 1.5          | 0.03      | 0.03      | 0.07      |
| max         |     | 57.5    | 26       | 13        | 12.1         | 0.88      | 0.87      | 2.39      |

**Table 5 Supplementary Material:** List of accessions and country of origin of LCs included in the core set (119 LCs).

| accession name | country code | country of origin | remarks                          | accession name | country code | country of origin | remarks                          |
|----------------|--------------|-------------------|----------------------------------|----------------|--------------|-------------------|----------------------------------|
| 1190004        | IRQ          | Iraq              | Rustam Exp Farm 99               | 1190546        | ESP          | Spain             | Hembrilla alto                   |
| 1190007        | AUS          | Australia         |                                  | 1190551        | ESP          | Spain             | Hembrilla Rieti                  |
| 1190023        | AUS          | Australia         | College Purple                   | 1190560        | GRC          | Greece            | Asprotheri                       |
| 1190032        | IND          | India             | Dehak                            | 1190562        | GRC          | Greece            |                                  |
| 1190034        | IND          | India             | Desi                             | 1190566        | GRC          | Greece            |                                  |
| 1190040        | FRA          | France            | Favori                           | 1190568        | CHN          | China             |                                  |
| 1190042        | FRA          | France            | Inversal                         | 1190579        | IRN          | Iran              | Vassfe                           |
| 1190044        | MAR          | Morocco           |                                  | 1190580        | IRN          | Iran              |                                  |
| 1190045        | SYR          | Syria             | Douchani                         | 1190591        | PRT          | Portugal          | Trigo Anafil                     |
| 1190079        | IND          | India             | Dolatkhani (white)               | 1190605        | GRC          | Greece            | Karabash                         |
| 1190081        | IND          | India             | Gahu (Nepali) or Kyo (Sikkimese) | 1190624        | BGR          | Bulgaria          | Svalene                          |
| 1190092        | IND          | India             | Desi                             | 1190627        | IRN          | Iran              |                                  |
| 1190103        | ITA          | Italy             | Gentil Rossa                     | 1190629        | IRN          | Iran              | Qizilqin Boghda                  |
| 1190110        | FRA          | France            | Carré Géant blanc                | 1190637        | TUR          | Turkey            |                                  |
| 1190126        | IND          | India             | Dolatkhani (white)               | 1190639        | CRE          | Crete             |                                  |
| 1190127        | IND          | India             | Thori (beardless)                | 1190651        | CHN          | China             |                                  |
| 1190139        | FRA          | France            | Bladette de Besplas              | 1190652        | CHN          | China             |                                  |
| 1190141        | CHN          | China             | Aurora                           | 1190662        | ROU          | Romania           | Samanta 1252                     |
| 1190145        | ESP          | Spain             | Squarehead's Master              | 1190667        | POL          | Poland            | Zlotka Miczynskiego              |
| 1190149        | GBR          | United Kingdom    | Mocho de Burgos                  | 1190671        | SUN          | USSR              | ferrugineum A1.                  |
| 1190160        | ESP          | Spain             | Meerutti Desi                    | 1190680        | ITA          | Italy             | Grano locale                     |
| 1190166        | IND          | India             | Kujawianka                       | 1190683        | ESP          | Spain             | Catalan de grano corto pesado    |
| 1190181        | POL          | Poland            | Wielawicka                       | 1190685        | ESP          | Spain             | Trigo duros                      |
| 1190199        | IND          | India             | Boojri (bearded)                 | 1190690        | GRC          | Greece            |                                  |
| 1190209        | EGY          | Egypt             | Belardi 24B                      | 1190694        | IND          | India             | Lyallpur 8A                      |
| 1190216        | MAR          | Morocco           |                                  | 1190698        | CHN          | China             |                                  |
| 1190218        | TUN          | Tunisia           | Sbei Noir                        | 1190700        | CHN          | China             | Kaifeng 323-9                    |
| 1190219        | ESP          | Spain             | Shan wheat                       | 1190704        | IRN          | Iran              | Ma'auneh                         |
| 1190223        | MMR          | Burma             | Red wheat                        | 1190705        | IRN          | Iran              | Koosch                           |
| 1190224        | CHN          | China             |                                  | 1190707        | IND          | India             | Walaiti (Mastung wheat)          |
| 1190231        | HUN          | Hungary           |                                  | 1190722        | CHN          | China             |                                  |
| 1190238        | IRN          | Iran              | Barbilla                         | 1190729        | IRN          | Iran              | Gandum-i-Jiruft                  |
| 1190239        | ESP          | Spain             | Soor Ghanum                      | 1190731        | IND          | India             | Gahu (Nepali) or Kyo (Sikkimese) |
| 1190246        | IND          | India             |                                  | 1190732        | IND          | India             | Gahu (Nepali) or Kyo (Sikkimese) |
| 1190254        | MAR          | Morocco           |                                  | 1190740        | SUN          | USSR              |                                  |
| 1190264        | CAI          | Canary Islands    |                                  | 1190742        | DZA          | Algeria           |                                  |
| 1190273        | ESP          | Spain             |                                  | 1190746        | SUN          | USSR              | Muganka                          |
| 1190281        | GRC          | Greece            | Deve                             | 1190747        | ETH          | Ethiopia          |                                  |
| 1190291        | CYP          | Cyprus            | Psathas                          | 1190749        | SUN          | USSR              |                                  |
| 1190292        | CYP          | Cyprus            | Asprokoutsoullon                 | 1190750        | SUN          | USSR              | Valki Exp Sta 3                  |
| 1190299        | TUR          | Turkey            |                                  | 1190753        | SUN          | USSR              | Valki Exp Sta 1                  |
| 1190300        | TUR          | Turkey            |                                  | 1190771        | SUN          | USSR              |                                  |
| 1190305        | EGY          | Egypt             |                                  | 1190777        | FIN          | Finland           |                                  |
| 1190308        | IRN          | Iran              |                                  | 1190784        | ITA          | Italy             | Oberdan                          |
| 1190313        | MMR          | Burma             | 2193/20-12                       | 1190788        | SUN          | USSR              |                                  |
| 1190324        | CHN          | China             |                                  | 1190789        | SUN          | USSR              | Abi                              |
| 1190325        | GBR          | United Kingdom    |                                  | 1190811        | TUN          | Tunisia           |                                  |
| 1190349        | BGR          | Bulgaria          | Golema Franga                    | 1190814        | TUN          | Tunisia           | Allorca                          |
| 1190352        | YUG          | Yugoslavia        |                                  | 1190816        | ITA          | Italy             |                                  |
| 1190355        | YUG          | Yugoslavia        |                                  | 1190827        | CHN          | China             |                                  |
| 1190360        | YUG          | Yugoslavia        | Veliko Hoce                      | 1190912        | HUN          | Hungary           |                                  |
| 1190387        | ESP          | Spain             |                                  |                |              |                   |                                  |
| 1190396        | PRT          | Portugal          | Trigo Rietti                     |                |              |                   |                                  |
| 1190397        | PRT          | Portugal          | Trigo Ribeiro                    |                |              |                   |                                  |
| 1190398        | PLE          | Palestine         | Abu Fashi                        |                |              |                   |                                  |
| 1190406        | IND          | India             | Desi                             |                |              |                   |                                  |
| 1190420        | IND          | India             | Dhania                           |                |              |                   |                                  |
| 1190433        | IND          | India             | Soor Ghanum                      |                |              |                   |                                  |
| 1190440        | CHN          | China             |                                  |                |              |                   |                                  |
| 1190444        | CHN          | China             |                                  |                |              |                   |                                  |
| 1190451        | ROU          | Romania           | Samanta 117                      |                |              |                   |                                  |
| 1190460        | AFG          | Afghanistan       |                                  |                |              |                   |                                  |
| 1190468        | AFG          | Afghanistan       |                                  |                |              |                   |                                  |
| 1190471        | AFG          | Afghanistan       |                                  |                |              |                   |                                  |
| 1190474        | AFG          | Afghanistan       |                                  |                |              |                   |                                  |
| 1190475        | AFG          | Afghanistan       |                                  |                |              |                   |                                  |
| 1190481        | POL          | Poland            | Ostka Skomoroska                 |                |              |                   |                                  |
| 1190483        | POL          | Poland            | Surka Oscista                    |                |              |                   |                                  |
| 1190496        | MAR          | Morocco           |                                  |                |              |                   |                                  |
| 1190507        | AUS          | Australia         |                                  |                |              |                   |                                  |

**Table 6 Supplementary Material:** Diversity statistics of the core set (119 LCs). The core set preserves 98% or 96% of the total genetic diversity (diversity index  $d_{Nei}$  or  $d_{SWI}$ , respectively)

| marker name | missing | $d_{AR}$ | $d_{RAR}$ | $\hat{r}(g)$ | $d_{Nei}$ | $d_{PIC}$ | $d_{SWI}$ |
|-------------|---------|----------|-----------|--------------|-----------|-----------|-----------|
| barc019     | 0.80    | 12       | 4         | 8.20         | 0.77      | 0.74      | 1.78      |
| barc021     | 2.50    | 11       | 3         | 7.80         | 0.57      | 0.55      | 1.38      |
| barc029     | 3.30    | 7        | 1         | 5.70         | 0.68      | 0.63      | 1.36      |
| barc032     | 0.80    | 11       | 1         | 9.50         | 0.84      | 0.82      | 2.04      |
| barc096     | 0.80    | 5        | 2         | 3.60         | 0.51      | 0.44      | 0.89      |
| barc097     | 18.20   | 7        | 0         | 5.70         | 0.75      | 0.71      | 1.52      |
| barc107     | 1.70    | 9        | 4         | 5.40         | 0.54      | 0.48      | 1.08      |
| barc110     | 0.80    | 20       | 5         | 15.10        | 0.92      | 0.92      | 2.71      |
| barc127     | 0.80    | 9        | 2         | 7.50         | 0.81      | 0.78      | 1.82      |
| barc134     | 16.50   | 14       | 5         | 9.30         | 0.80      | 0.78      | 1.93      |
| barc164     | 0.80    | 19       | 5         | 13.30        | 0.88      | 0.87      | 2.45      |
| barc172     | 0.80    | 9        | 0         | 7.50         | 0.80      | 0.77      | 1.78      |
| barc240     | 0.80    | 23       | 10        | 13.90        | 0.86      | 0.85      | 2.44      |
| cfid079.a   | 9.10    | 19       | 4         | 14.00        | 0.90      | 0.90      | 2.56      |
| cfid079.b   | 14.90   | 5        | 0         | 4.90         | 0.69      | 0.64      | 1.35      |
| gdm111.b    | 7.40    | 10       | 2         | 7.60         | 0.77      | 0.74      | 1.73      |
| gdm129      | 0.80    | 6        | 3         | 3.80         | 0.20      | 0.20      | 0.49      |
| gwm003      | 0.80    | 11       | 2         | 8.00         | 0.72      | 0.69      | 1.66      |
| gwm018      | 1.70    | 8        | 0         | 7.00         | 0.75      | 0.71      | 1.62      |
| gwm030.a    | 28.90   | 11       | 2         | 8.50         | 0.77      | 0.75      | 1.80      |
| gwm030.b    | 9.90    | 21       | 3         | 17.30        | 0.94      | 0.93      | 2.88      |
| gwm046      | 4.10    | 19       | 3         | 14.20        | 0.91      | 0.90      | 2.58      |
| gwm095      | 0.80    | 8        | 1         | 7.00         | 0.82      | 0.80      | 1.83      |
| gwm155      | 0.80    | 15       | 3         | 10.40        | 0.79      | 0.77      | 1.97      |
| gwm190      | 0.80    | 13       | 5         | 8.90         | 0.81      | 0.79      | 1.93      |
| gwm213      | 1.70    | 36       | 11        | 23.00        | 0.95      | 0.95      | 3.31      |
| gwm219      | 0.80    | 23       | 5         | 17.00        | 0.93      | 0.92      | 2.83      |
| gwm291      | 12.40   | 22       | 4         | 16.00        | 0.88      | 0.87      | 2.59      |
| gwm312      | 0.80    | 27       | 10        | 15.90        | 0.88      | 0.87      | 2.61      |
| gwm337      | 3.30    | 19       | 4         | 13.10        | 0.86      | 0.85      | 2.38      |
| gwm357      | 1.70    | 6        | 1         | 4.90         | 0.70      | 0.64      | 1.34      |
| gwm437      | 0.80    | 22       | 4         | 16.40        | 0.92      | 0.92      | 2.78      |
| gwm456      | 1.70    | 15       | 5         | 10.50        | 0.83      | 0.81      | 2.08      |
| gwm526.a    | 4.10    | 4        | 0         | 4.00         | 0.62      | 0.57      | 1.16      |
| gwm526.b    | 3.30    | 10       | 2         | 7.70         | 0.74      | 0.71      | 1.66      |
| gwm539      | 1.70    | 36       | 16        | 21.80        | 0.95      | 0.95      | 3.24      |
| gwm570      | 0.80    | 19       | 6         | 13.40        | 0.90      | 0.89      | 2.50      |
| gwm608.a    | 20.70   | 6        | 0         | 6.00         | 0.79      | 0.76      | 1.68      |
| gwm608.c    | 0.80    | 13       | 1         | 11.00        | 0.89      | 0.88      | 2.33      |
| psp3100     | 1.70    | 34       | 14        | 19.60        | 0.93      | 0.92      | 3.02      |
| wmc093      | 1.70    | 5        | 2         | 2.90         | 0.51      | 0.40      | 0.80      |
| wmc105      | 3.30    | 30       | 12        | 17.20        | 0.91      | 0.90      | 2.80      |
| wmc110      | 28.90   | 3        | 0         | 2.70         | 0.27      | 0.24      | 0.50      |
| wmc154      | 0.80    | 22       | 9         | 13.00        | 0.76      | 0.75      | 2.12      |
| wmc168      | 14.00   | 27       | 9         | 16.40        | 0.84      | 0.84      | 2.54      |
| average     | 5.20    | 15.10    | 4.10      | 10.60        | 0.77      | 0.75      | 2.00      |
| min         | 0.8     | 3        | 0         | 2.7          | 0.20      | 0.20      | 0.49      |
| max         | 28.9    | 36       | 16        | 23           | 0.95      | 0.95      | 3.31      |

**Table 7 Supplementary Material:** Average levels of genetic diversity of wheat collections as published in the literature compared to the present study. Abbreviations: LC landrace cultivar; MC modern elite cultivar; UK United Kingdom; USA United States of America; AUS Australia; EUR Europe; CHI China; IPK Leibniz Institute of Plant Genetics and Crop Plant Research, Germany; INRA French National Institute for Agricultural Research; n.a. not applicable

| material                   | accession number | marker number | average allele number | range of allele number | $d_{PIC}$ | Reference                 |
|----------------------------|------------------|---------------|-----------------------|------------------------|-----------|---------------------------|
| IPK LCs                    | 998              | 24            | 18.1                  | 4-46                   | 0.77      | [Huang et al., 2002]      |
| MCs                        | 502              | 20            | 10.5                  | 4-22                   | 0.65      | [Röder et al., 2002]      |
| CHI LCs                    | 24               | 40            | 6.9                   | 1-16                   | 0.42      | [Wei et al., 2005]        |
| EUR MCs 1840-2000          | 480              | 39            | 16.4                  | 4-40                   | 0.65      | [Roussel et al., 2005]    |
| UK/USA/AUS MCs 1845-2005   | 140              | 379           | DArT                  | n. a.                  | 0.40      | [White et al., 2008]      |
| INRA LCs + MCs             | 3,942            | 38            | 23.9                  | 7-45                   | 0.74      | [Balfourier et al., 2007] |
| AUS LCs + MCs              | 1,057            | 178           | DArT                  | n.a.                   | 0.44      | [Raman et al., 2010]      |
| Gediflux EUR MCs 1945-2000 | 511              | 42            | 10.5                  | 1-16                   | 0.65      | this study                |
| Watkins LCs                | 826              | 41            | 22.4                  | 3-65                   | 0.75      | this study                |

**Table 8 Supplementary Material:** Genetic markers employed on the Watkins collection that were also used by [Huang et al., 2002] (H) and/or [Balfourier et al., 2007] (B) and the detected levels of genetic diversity for these markers.

| marker | chr | $d_{AR}$ | $d_{RAR}$ | $d_{Nei}$ | $d_{AR}$<br>(H) | $d_{Nei}$<br>(H) | $d_{AR}$<br>(B) | $d_{RAR}$<br>(B) | $d_{Nei}$<br>(B) |
|--------|-----|----------|-----------|-----------|-----------------|------------------|-----------------|------------------|------------------|
| gwm003 | 3D  | 16       | 9         | 0.69      | 10              | 0.67             | -               | -                | -                |
| gwm018 | 1B  | 15       | 7         | 0.74      | 13              | 0.77             | -               | -                | -                |
| gwm046 | 7B  | 28       | 10        | 0.91      | 24              | 0.88             | 27              | 21               | 0.87             |
| gwm095 | 2A  | 14       | 7         | 0.81      | 13              | 0.78             | -               | -                | -                |
| gwm190 | 5D  | 22       | 12        | 0.84      | 23              | 0.82             | 25              | 19               | 0.74             |
| gwm219 | 6B  | 16       | 8         | 0.78      | -               | -                | 30              | 24               | 0.87             |
| gwm312 | 2A  | 19       | 9         | 0.79      | -               | -                | 45              | 39               | 0.87             |
| gwm325 | 6D  | 6        | 3         | 0.57      | -               | -                | 18              | 11               | 0.77             |
| gwm337 | 1D  | 25       | 11        | 0.88      | 24              | 0.83             | 23              | 19               | 0.85             |
| gwm357 | 1A  | 11       | 4         | 0.73      | 12              | 0.69             | -               | -                | -                |
| gwm437 | 7D  | 26       | 8         | 0.93      | 23              | 0.90             | 28              | 22               | 0.86             |
| gwm539 | 2D  | 61       | 34        | 0.96      | -               | -                | 40              | 35               | 0.89             |

**Table 9 Supplementary Material:** Comparison of the diversity statistics for 14 markers used to genotype the Watkins collection as well as the Gediflux collection. Abbreviations: chr: chromosome locations according to Gramene database (<http://www.gramene.org/markers>). See Tab. 1 for the diversity index keys in the column headers. Columns labelled G for Gediflux collection or W for Watkins collection.

| marker name | chr | $d_{AR}$<br>G | $d_{RAR}$<br>G | $\hat{r}(g)$<br>G | $d_{Nei}$<br>G | $d_{PIC}$<br>G | $d_{SWI}$<br>G | $d_{AR}$<br>W | $d_{RAR}$<br>W | $\hat{r}(g)$<br>W | $d_{Nei}$<br>W | $d_{PIC}$<br>W | $d_{SWI}$<br>W |
|-------------|-----|---------------|----------------|-------------------|----------------|----------------|----------------|---------------|----------------|-------------------|----------------|----------------|----------------|
| gwm003      | 3D  | 4             | 2              | 2.3               | 0.50           | 0.38           | 0.72           | 16            | 9              | 7.2               | 0.69           | 0.66           | 1.56           |
| gwm018      | 1B  | 10            | 3              | 5.3               | 0.62           | 0.54           | 1.21           | 15            | 7              | 7.8               | 0.74           | 0.71           | 1.69           |
| gwm046      | 7B  | 12            | 3              | 7.8               | 0.69           | 0.67           | 1.6            | 28            | 10             | 15.1              | 0.91           | 0.91           | 2.71           |
| gwm095      | 2A  | 6             | 1              | 4.8               | 0.63           | 0.58           | 1.22           | 14            | 7              | 7.7               | 0.81           | 0.79           | 1.86           |
| gwm155      | 3A  | 9             | 3              | 5.0               | 0.57           | 0.51           | 1.13           | 24            | 13             | 10.1              | 0.80           | 0.78           | 2.01           |
| gwm190      | 5D  | 7             | 2              | 5.0               | 0.74           | 0.70           | 1.46           | 22            | 12             | 9.9               | 0.84           | 0.83           | 2.12           |
| gwm213      | 5B  | 14            | 8              | 6.4               | 0.70           | 0.66           | 1.50           | 46            | 19             | 23                | 0.96           | 0.95           | 3.38           |
| gwm219      | 6B  | 16            | 8              | 8.3               | 0.78           | 0.76           | 1.85           | 30            | 11             | 16.0              | 0.91           | 0.91           | 2.76           |
| gwm291      | 5A  | 11            | 4              | 6.3               | 0.65           | 0.62           | 1.42           | 29            | 12             | 15.0              | 0.87           | 0.86           | 2.56           |
| gwm312      | 2A  | 19            | 9              | 9.2               | 0.79           | 0.77           | 1.95           | 43            | 25             | 17.3              | 0.89           | 0.88           | 2.80           |
| gwm357      | 1A  | 4             | 1              | 3.1               | 0.53           | 0.47           | 0.92           | 11            | 4              | 6.1               | 0.73           | 0.69           | 1.53           |
| gwm437      | 7D  | 17            | 11             | 6.4               | 0.53           | 0.50           | 1.23           | 26            | 8              | 16.3              | 0.93           | 0.93           | 2.83           |
| gwm456      | 3D  | 9             | 3              | 5.8               | 0.70           | 0.65           | 1.44           | 18            | 7              | 10.1              | 0.84           | 0.82           | 2.10           |
| gwm570      | 6A  | 9             | 2              | 6.0               | 0.68           | 0.63           | 1.40           | 26            | 14             | 12.7              | 0.89           | 0.88           | 2.45           |
